# Supplementary material
Source: PubMed Central journal article supplement (PMC4929045)
Supplement: NIHMS794329-supplement-Supporting_Information.pdf [file NIHMS794329-supplement-Supporting_Information.pdf]

## Supplementary figures

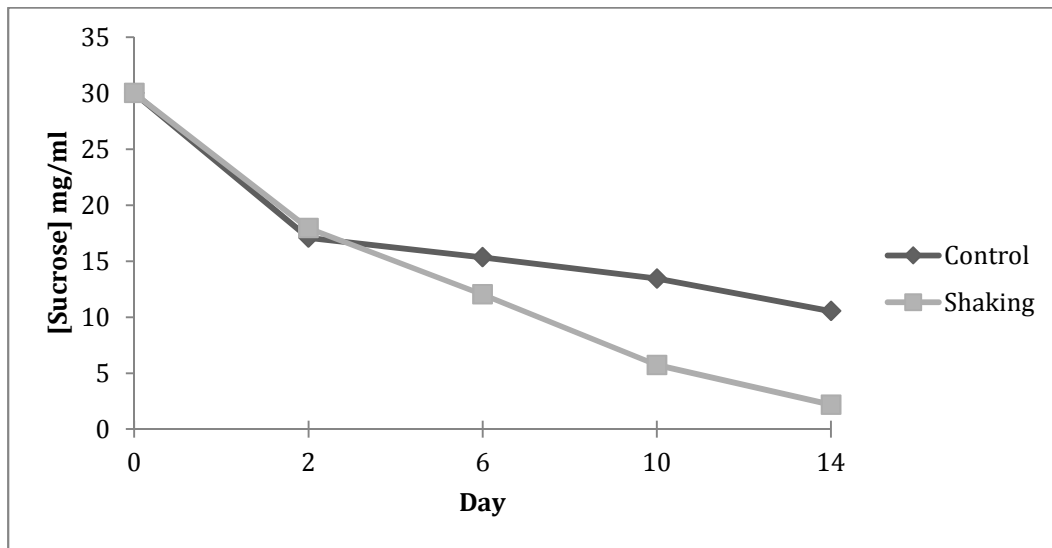

**Supplementary figure 1.** Sucrose depletion in hydroponic medium between weeks 7 and 9 for the stationary control and the shaking group. Values are for pooled samples from 3 plants.

### Methodology

Sucrose concentration was measured with a Sucrose Assay Kit (Sigma-Aldrich, Poole, UK - product code SCA-20). The assay was performed according to the manufacturer's instructions.

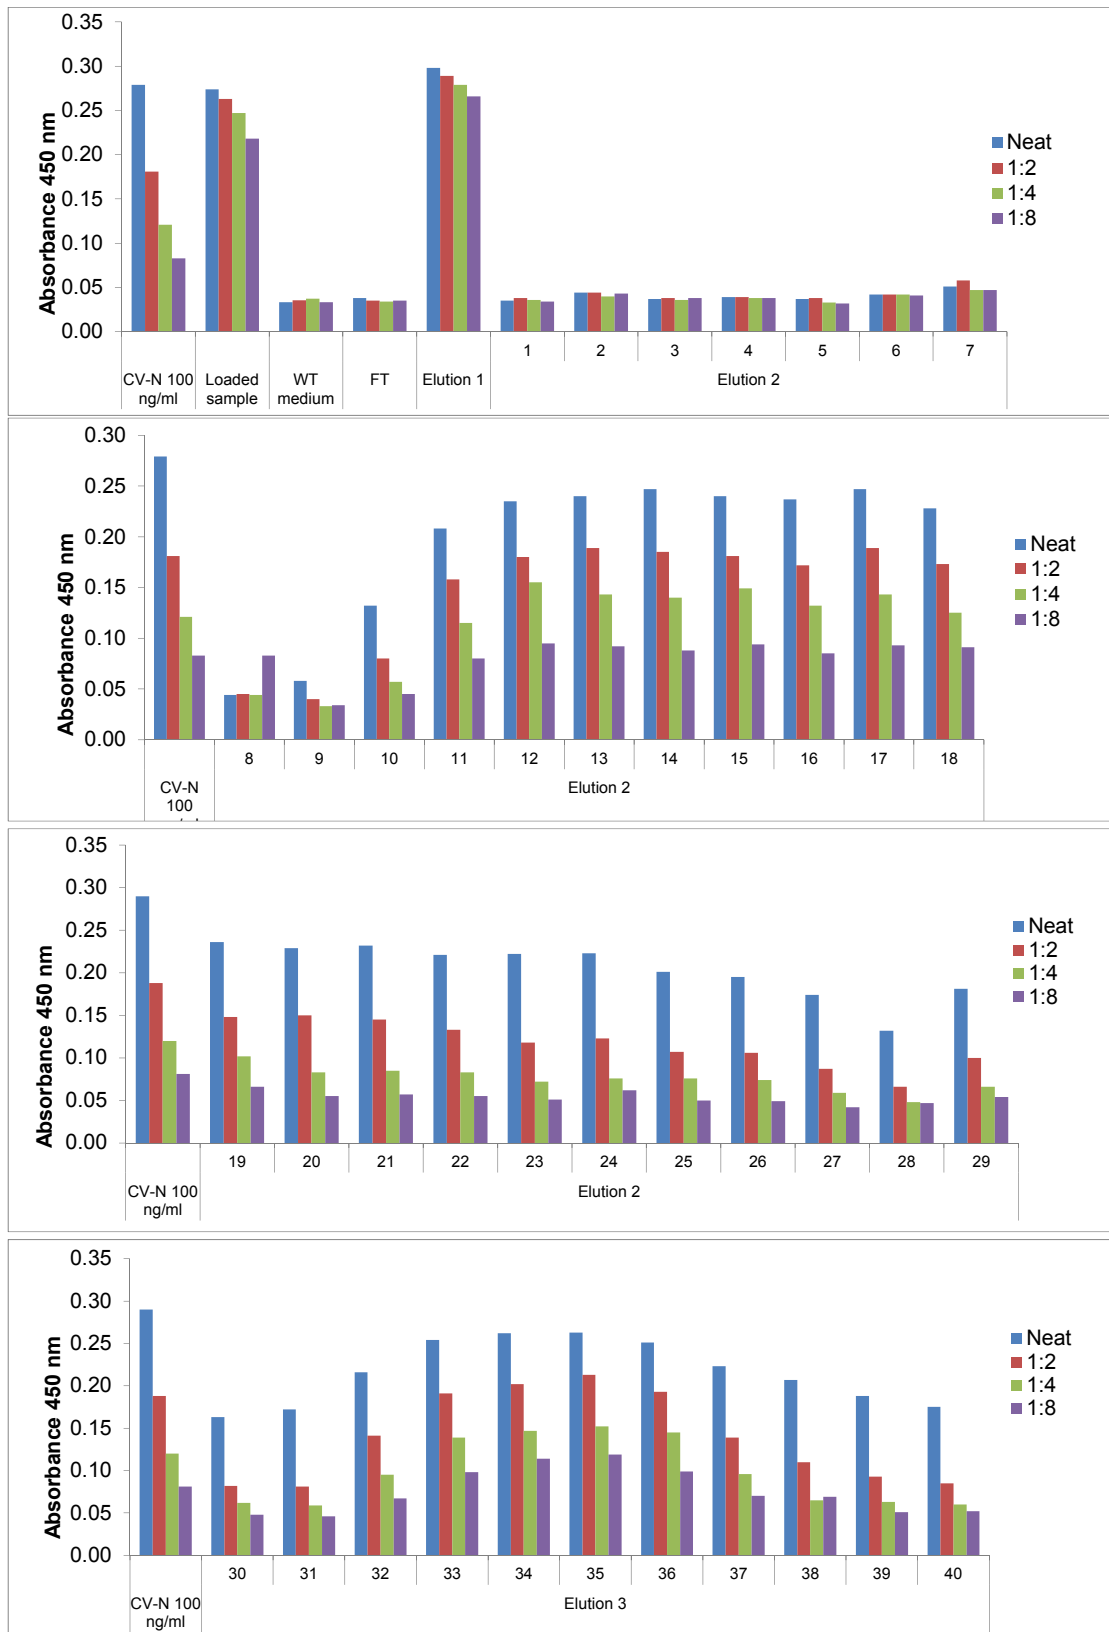

**Supplementary figure 2.** gp120 binding ELISA with eluted samples from first IEX run. 50 ml of dialyzed medium were loaded onto a 1 ml HiTrap Q HP column. After washing, elution was performed in three steps: 1 – 0 to 200 mM NaCl in buffer A (10 ml); 2 – gradient from 200mM to 1M NaCl in buffer A (30 ml, 1 ml fractions); 3 – 1M NaCl (10 ml, 1 ml fractions). Loaded samples and Flow-

through samples were diluted 10 times and elution fraction 100 times prior to loading (neat).

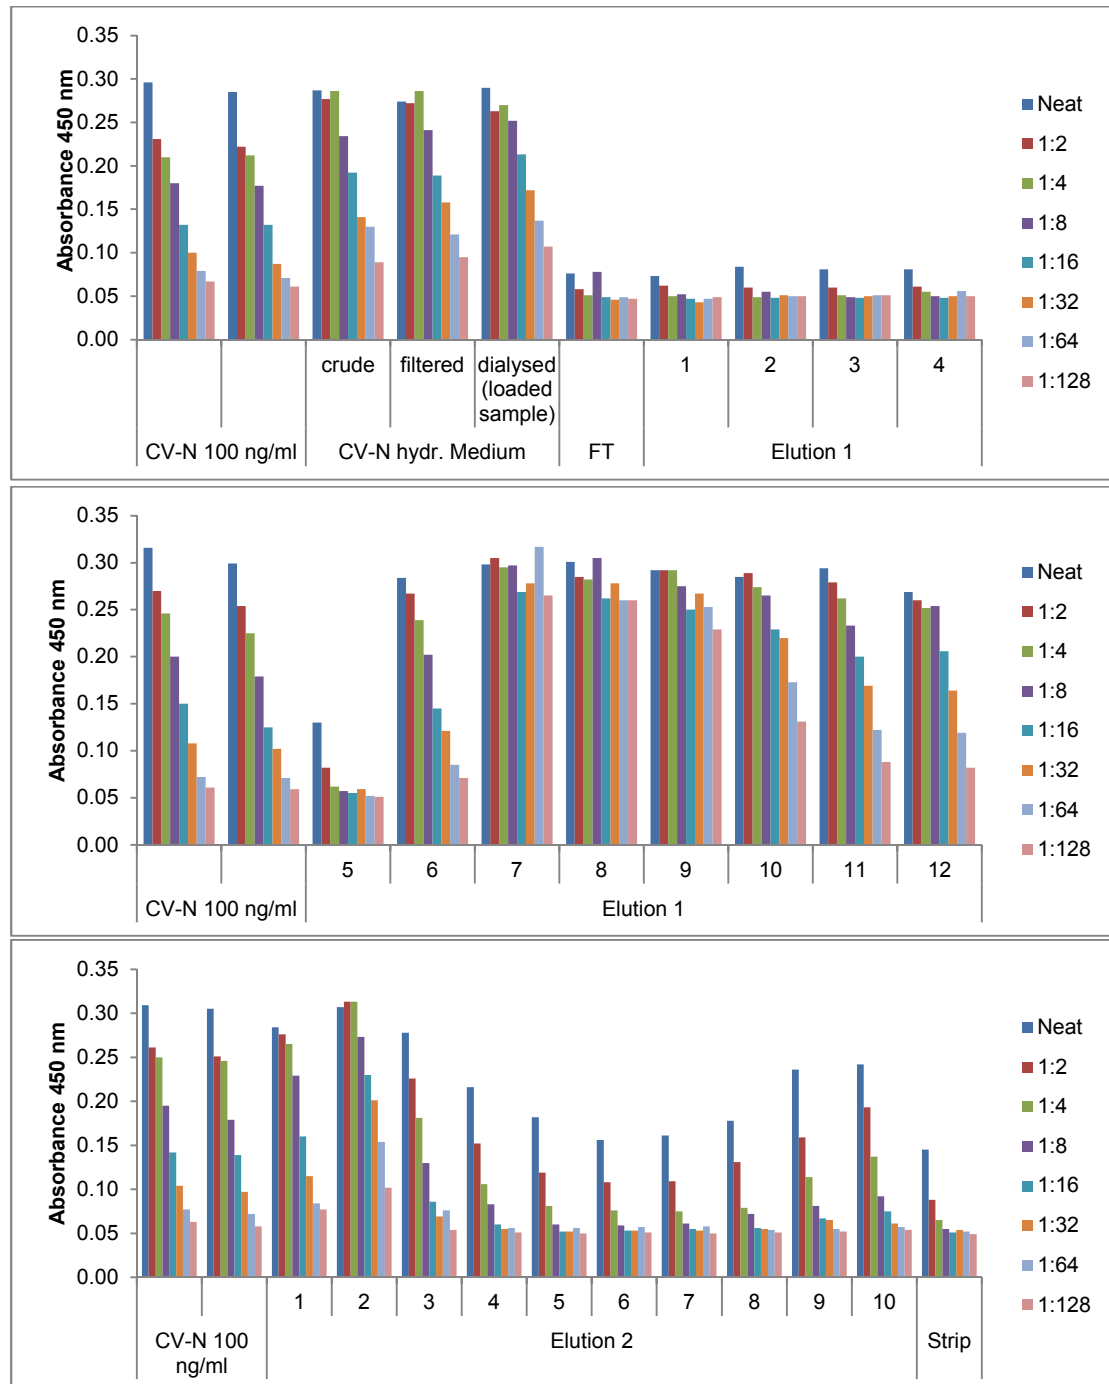

**Supplementary figure 3.** gp120 binding ELISA with eluted samples from second IEX run. 50 ml of dialysed medium were loaded onto a 1 ml HiTrap Q HP column. After washing, elution was performed in three steps: 1 – gradient from 0 to 200 mM NaCl in buffer A (12 ml, 1 ml fractions); 2 – gradient from 200mM to 1M NaCl in buffer A (10 ml, 1 ml fractions); Strip – 1M NaCl (10 ml). Hydroponic medium samples and FT were diluted 10 times and elution fractions were diluted 100 times prior to loading (neat).

**Supplementary Table 1.** Proteins identified in 'CV-N with NAA in MS' sample. Recombinant protein is highlighted in red, hits highlighted in blue indicate proteins differing from supplementary table 2.

| Hit number | Database access number     | Protein description                                                                                                                                                                                  | Mascot score | Mass   | emPAI |
|------------|----------------------------|------------------------------------------------------------------------------------------------------------------------------------------------------------------------------------------------------|--------------|--------|-------|
| 1          | gi 148299083               | subtilisin-like protease [Nicotiana tabacum]                                                                                                                                                         | 1211         | 81137  | 1.67  |
| 2          | gi 108752035 gb ABG02914.1 | cyanovirin-N [synthetic construct]                                                                                                                                                                   | 750          | 10923  | 27.27 |
| 3          | gi 116314                  | Endochitinase A precursor (CHN-A)[Nicotiana tabacum]                                                                                                                                                 | 629          | 35134  | 1.76  |
| 4          | gi 64976605                | peroxidase [Nicotiana tabacum]                                                                                                                                                                       | 593          | 38740  | 2.65  |
| 5          | gi 131015                  | Pathogenesis-related protein R major form precursor (Thaumatococcus-like protein E22)[Nicotiana tabacum]                                                                                             | 590          | 24650  | 2.65  |
| 6          | gi 63002585                | peroxidase [Nicotiana tabacum]                                                                                                                                                                       | 571          | 35563  | 1.48  |
| 7          | gi 63253080                | peroxidase [Nicotiana tabacum]                                                                                                                                                                       | 562          | 38505  | 2.35  |
| 8          | gi 129837                  | Lignin-forming anionic peroxidase precursor (TOPA)[Nicotiana tabacum]                                                                                                                                | 544          | 34652  | 2.83  |
| 9          | gi 24430421                | 41 kD chloroplast nucleoid DNA binding protein (CND41) [Nicotiana sylvestris]                                                                                                                        | 528          | 53600  | 0.83  |
| 10         | gi 2541876                 | CND41, chloroplast nucleoid DNA binding protein [Nicotiana tabacum]                                                                                                                                  | 507          | 53413  | 0.96  |
| 11         | gi 62362434                | nectarin IV [Nicotiana langsdorffii x Nicotiana sanderae]                                                                                                                                            | 504          | 46948  | 0.85  |
| 12         | gi 467689                  | chitinase/lysozyme [Nicotiana tabacum]                                                                                                                                                               | 483          | 41993  | 1.35  |
| 13         | gi 83281191                | putative glycerophosphoryl diester phosphodiesterase family protein [Nicotiana tabacum]                                                                                                              | 442          | 81954  | 0.3   |
| 14         | gi 505267                  | chitinase, class V [Nicotiana tabacum]                                                                                                                                                               | 414          | 41754  | 0.68  |
| 15         | gi 119011                  | Glucan endo-1,3-beta-glucosidase, basic vacuolar isoform GLB precursor ((1->3)-beta-glucan endohydrolase) ((1->3)-beta-glucanase) (Beta-1,3-endoglucanase, basic) (Glucanase GLB)[Nicotiana tabacum] | 391          | 40417  | 1.22  |
| 16         | gi 37359706                | LEXYL1 [Solanum lycopersicum]                                                                                                                                                                        | 385          | 83111  | 0.42  |
| 17         | gi 116342                  | Acidic endochitinase Q precursor (Pathogenesis-related protein Q) (PR-Q)[Nicotiana tabacum]                                                                                                          | 345          | 27615  | 0.92  |
| 18         | gi 5360263                 | NtPRp27 [Nicotiana tabacum]                                                                                                                                                                          | 337          | 27361  | 0.92  |
| 19         | gi 1167854                 | PR protein; osmotin [Nicotiana tabacum]                                                                                                                                                              | 335          | 26744  | 1.22  |
| 20         | gi 131017                  | Pathogenesis-related protein R minor form precursor (PR-R) (PROB12) (Thaumatococcus-like protein E2)[Nicotiana tabacum]                                                                              | 327          | 24535  | 1.06  |
| 21         | gi 3790355                 | chitinase 134 [Nicotiana tabacum]                                                                                                                                                                    | 319          | 29184  | 0.84  |
| 22         | gi 5381253                 | peroxidase [Nicotiana tabacum]                                                                                                                                                                       | 299          | 34348  | 0.52  |
| 23         | gi 37359708                | LEXYL2 [Solanum lycopersicum]                                                                                                                                                                        | 299          | 68869  | 0.3   |
| 24         | gi 7547630                 | pathogen- and wound-inducible antifungal protein CBP20 precursor [Nicotiana tabacum]                                                                                                                 | 285          | 22153  | 0.91  |
| 25         | gi 116332                  | Acidic endochitinase precursor[Nicotiana tabacum]                                                                                                                                                    | 279          | 31263  | 0.98  |
| 26         | gi 3913932                 | Proteinase inhibitor type-2 precursor (Proteinase inhibitor type II)                                                                                                                                 | 258          | 20970  | 0.96  |
| 27         | gi 1255951                 | PS60 [Nicotiana tabacum]                                                                                                                                                                             | 251          | 60107  | 0.2   |
| 28         | gi 19771                   | acidic chitinase PR-P [Nicotiana tabacum]                                                                                                                                                            | 241          | 27512  | 0.68  |
| 29         | gi 8919178                 | alpha-glucosidase [Solanum tuberosum]                                                                                                                                                                | 236          | 104620 | 0.19  |
| 30         | gi 267124                  | Thioredoxin H-type 1 (Trx-H1) [Nicotiana tabacum]                                                                                                                                                    | 229          | 13947  | 1.1   |
| 31         | gi 100284                  | superoxide dismutase (EC 1.15.1.1) (Fe) - curled-leaved tobacco                                                                                                                                      | 215          | 25434  | 0.52  |
| 32         | gi 27803890                | NtPRp27-like protein [Solanum tuberosum]                                                                                                                                                             | 211          | 25115  | 0.33  |
| 33         | gi 130840                  | Pathogenesis-related protein PR-4B precursor [Nicotiana tabacum]                                                                                                                                     | 210          | 16225  | 0.53  |
| 34         | gi 6538778                 | biotic cell death-associated protein [Nicotiana glutinosa]                                                                                                                                           | 201          | 25142  | 0.53  |
| 35         | gi 48375044                | putative mitochondrial malate dehydrogenase [Nicotiana tabacum]                                                                                                                                      | 201          | 22024  | 0.9   |
| 36         | gi 19962                   | pathogenesis-related protein 4A [Nicotiana tabacum]                                                                                                                                                  | 200          | 16195  | 1.36  |
| 37         | gi 90992878                | phylloplanin [Nicotiana tabacum]                                                                                                                                                                     | 199          | 11302  | 1.47  |
| 38         | gi 157830095               | Chain A, Pathogenesis-Related Protein 5d From Nicotiana Tabacum                                                                                                                                      | 197          | 22745  | 0.86  |
| 39         | gi 21388550                | putative mitochondrial NAD-dependent malate dehydrogenase [Solanum tuberosum]                                                                                                                        | 192          | 36144  | 0.49  |
| 40         | gi 5725356                 | alpha-D-xylosidase [Tropaeolum majus]                                                                                                                                                                | 190          | 104870 | 0.15  |
| 41         | gi 83283995                | fructose-bisphosphate aldolase-like protein [Solanum tuberosum]                                                                                                                                      | 187          | 38594  | 0.31  |
| 42         | gi 30526289                | 29 kDa chitinase-like thermal hysteresis protein [Solanum dulcamara]                                                                                                                                 | 175          | 28827  | 0.64  |
| 43         | gi 77999255                | unknown [Solanum tuberosum]                                                                                                                                                                          | 169          | 38413  | 0.32  |
| 44         | gi 19944                   | unnamed protein product [Nicotiana tabacum]                                                                                                                                                          | 165          | 18575  | 1.13  |
| 45         | gi 2497757                 | Non-specific lipid-transfer protein 1 precursor (LTP 1) (Pathogenesis-related protein 14) (PR-14) [Nicotiana tabacum]                                                                                | 164          | 11516  | 0.81  |
| 46         | gi 2213867                 | fructose-biphosphate aldolase [Mesembryanthemum crystallinum]                                                                                                                                        | 163          | 38134  | 0.33  |
| 47         | gi 130846                  | Basic form of pathogenesis-related protein 1 precursor (PRP 1) [Nicotiana tabacum]                                                                                                                   | 159          | 19716  | 0.71  |
| 48         | gi 32482806                | putative xyloglucanase inhibitor [Solanum tuberosum]                                                                                                                                                 | 159          | 46779  | 0.14  |

|    |                              |                                                                                                                                                                                                       |     |        |       |
|----|------------------------------|-------------------------------------------------------------------------------------------------------------------------------------------------------------------------------------------------------|-----|--------|-------|
| 49 | <a href="#">gi 74355968</a>  | <a href="#">alpha-L-arabinofuranosidase [Raphanus sativus]</a>                                                                                                                                        | 156 | 83723  | 0.14  |
| 50 | <a href="#">gi 786337</a>    | <a href="#">osmotin I=group 5 basic pathogenesis-related protein (N-terminal) [Nicotiana tabacum=tobacco, Samsun NN, Peptide Partial, 25 aa]</a>                                                      | 155 | 2696   | 21.45 |
| 51 | <a href="#">gi 130827</a>    | <a href="#">Pathogenesis-related protein 1B precursor (PR-1B) [Nicotiana tabacum]</a>                                                                                                                 | 145 | 18488  | 1.31  |
| 52 | <a href="#">gi 8439545</a>   | <a href="#">methionine synthase [Solanum tuberosum]</a>                                                                                                                                               | 144 | 84613  | 0.14  |
| 53 | <a href="#">gi 46250719</a>  | <a href="#">pathogenesis-related protein [Nicotiana tabacum]</a>                                                                                                                                      | 144 | 27523  | 0.47  |
| 54 | <a href="#">gi 182410392</a> | <a href="#">PR1 protein [Solanum lycopersicum]</a>                                                                                                                                                    | 131 | 20110  | 0.42  |
| 55 | <a href="#">gi 547733</a>    | <a href="#">Proteinase inhibitor I-B precursor (PI-IB) (Inhibitor of microbial serine proteinases major isoform)[Nicotiana tabacum]</a>                                                               | 131 | 11908  | 0.78  |
| 56 | <a href="#">gi 24638017</a>  | <a href="#">Malate dehydrogenase, mitochondrial precursor <b>Fragaria x ananassa</b></a>                                                                                                              | 128 | 35600  | 0.22  |
| 57 | <a href="#">gi 157331729</a> | <a href="#">unnamed protein product [Vitis vinifera]</a>                                                                                                                                              | 125 | 60362  | 0.2   |
| 58 | <a href="#">gi 115486089</a> | <a href="#">Os11g0592000 [Oryza sativa (japonica cultivar-group)]</a>                                                                                                                                 | 124 | 16246  | 0.54  |
| 59 | <a href="#">gi 498926</a>    | <a href="#">glucan endo-1,3-beta-D-glucosidase [Solanum lycopersicum]</a>                                                                                                                             | 121 | 37839  | 0.21  |
| 60 | <a href="#">gi 544202</a>    | <a href="#">Glucan endo-1,3-beta-glucosidase, acidic isoform PR-Q~ precursor ((1-&gt;3)-beta-glucan endohydrolase) ((1-&gt;3)-beta-glucanase) (Beta-1,3-endoglucanase) (PR-35)[Nicotiana tabacum]</a> | 116 | 36972  | 0.21  |
| 61 | <a href="#">gi 9759007</a>   | <a href="#">pectin methylesterase-like protein [Arabidopsis thaliana]</a>                                                                                                                             | 114 | 63463  | 0.12  |
| 62 | <a href="#">gi 547743</a>    | <a href="#">Trypsin inhibitor 1 precursor (Trypsin inhibitor I) (NSTI-I)Nicotiana sylvestris</a>                                                                                                      | 114 | 10458  | 0.92  |
| 63 | <a href="#">gi 130828</a>    | <a href="#">Pathogenesis-related protein 1C precursor (PR-1C)Nicotiana sylvestris [Nicotiana tabacum]</a>                                                                                             | 113 | 18571  | 0.76  |
| 64 | <a href="#">gi 7939623</a>   | <a href="#">putative beta-galactosidase [Lycopersicon esculentum]</a>                                                                                                                                 | 110 | 93184  | 0.12  |
| 65 | <a href="#">gi 7672732</a>   | <a href="#">LRR receptor-like protein kinase [Nicotiana tabacum]</a>                                                                                                                                  | 109 | 101724 | 0.07  |
| 66 | <a href="#">gi 58416137</a>  | <a href="#">serpin [Cucumis sativus]</a>                                                                                                                                                              | 108 | 42576  | 0.09  |
| 67 | <a href="#">gi 146762261</a> | <a href="#">beta-xylosidase/alpha-L-arabinosidase [Medicago sativa subsp. x varia]</a>                                                                                                                | 108 | 83674  | 0.09  |
| 68 | <a href="#">gi 130826</a>    | <a href="#">Pathogenesis-related protein 1A precursor (PR-1A)[Nicotiana tabacum]</a>                                                                                                                  | 106 | 18562  | 0.76  |
| 69 | <a href="#">gi 586099</a>    | <a href="#">Thioredoxin H-type 2 (Trx-H2)[Nicotiana tabacum]</a>                                                                                                                                      | 104 | 13039  | 0.62  |
| 70 | <a href="#">gi 18403247</a>  | <a href="#">receptor protein kinase-related [Arabidopsis thaliana]</a>                                                                                                                                | 103 | 27846  | 0.29  |
| 71 | <a href="#">gi 116337</a>    | <a href="#">Basic endochitinase precursor[Nicotiana tabacum]</a>                                                                                                                                      | 102 | 32373  | 0.25  |
| 72 | <a href="#">gi 83778371</a>  | <a href="#">expansin-like protein precursor [Solanum tuberosum]</a>                                                                                                                                   | 99  | 28340  | 0.46  |
| 73 | <a href="#">gi 688429</a>    | <a href="#">tumor-related protein [Nicotiana glauca x Nicotiana langsdorffii]</a>                                                                                                                     | 96  | 13798  | 1.12  |
| 74 | <a href="#">gi 37951323</a>  | <a href="#">BYJ15 [Nicotiana tabacum]</a>                                                                                                                                                             | 95  | 16921  | 0.51  |
| 75 | <a href="#">gi 75153341</a>  | <a href="#">NAD(P)H:quinone oxidoreductase (NAD(P)H:QR)</a>                                                                                                                                           | 94  | 21302  | 0.39  |
| 76 | <a href="#">gi 157355185</a> | <a href="#">unnamed protein product [Vitis vinifera]</a>                                                                                                                                              | 92  | 39303  | 0.1   |
| 77 | <a href="#">gi 82568706</a>  | <a href="#">Serine carboxypeptidase [Prunus mume]</a>                                                                                                                                                 | 88  | 55936  | 0.07  |
| 78 | <a href="#">gi 75755983</a>  | <a href="#">TO76-23 [Taraxacum officinale]</a>                                                                                                                                                        | 87  | 12020  | 0.33  |
| 79 | <a href="#">gi 157328520</a> | <a href="#">unnamed protein product [Vitis vinifera]</a>                                                                                                                                              | 84  | 33094  | 0.11  |
| 80 | <a href="#">gi 40288318</a>  | <a href="#">putative 6 repeat proteinase inhibitor [Nicotiana attenuata]</a>                                                                                                                          | 83  | 46464  | 0.08  |
| 81 | <a href="#">gi 113531030</a> | <a href="#">properoxidase [Picea abies]</a>                                                                                                                                                           | 81  | 32859  | 0.24  |
| 82 | <a href="#">gi 15219493</a>  | <a href="#">peroxidase, putative [Arabidopsis thaliana]</a>                                                                                                                                           | 80  | 37717  | 0.1   |
| 83 | <a href="#">gi 15234910</a>  | <a href="#">CYTC-2 (CYTOCHROME C-2); electron carrier [Arabidopsis thaliana]</a>                                                                                                                      | 74  | 12231  | 0.33  |
| 84 | <a href="#">gi 121663827</a> | <a href="#">class IV chitinase [Nicotiana tabacum]</a>                                                                                                                                                | 76  | 29885  | 0.38  |
| 85 | <a href="#">gi 119012</a>    | <a href="#">Glucan endo-1,3-beta-glucosidase, acidic isoform G19 precursor ((1-&gt;3)-beta-glucan endohydrolase) ((1-&gt;3)-beta-glucanase) (Beta-1,3-endoglucanase) (PR-2B) (PR-36)</a>              | 74  | 37699  | 0.1   |
| 86 | <a href="#">gi 123965222</a> | <a href="#">germin-like protein [Capsicum chinense]</a>                                                                                                                                               | 68  | 21032  | 0.18  |
| 87 | <a href="#">gi 147820458</a> | <a href="#">hypothetical protein [Vitis vinifera]</a>                                                                                                                                                 | 65  | 64811  | 0.06  |
| 88 | <a href="#">gi 16903357</a>  | <a href="#">endo-beta-1,4-glucanase precursor [Nicotiana tabacum]</a>                                                                                                                                 | 62  | 34512  | 0.14  |
| 89 | <a href="#">gi 18447763</a>  | <a href="#">putative serine carboxypeptidase precursor [Gossypium hirsutum]</a>                                                                                                                       | 57  | 56558  | 0.14  |
| 90 | <a href="#">gi 62909955</a>  | <a href="#">peroxidase [Pisum sativum]</a>                                                                                                                                                            | 54  | 34257  | 0.11  |
| 91 | <a href="#">gi 15231303</a>  | <a href="#">ATEXLA1 (ARABIDOPSIS THALIANA EXPANSIN-LIKE A1) [Arabidopsis thaliana]</a>                                                                                                                | 54  | 28683  | 0.13  |
| 92 | <a href="#">gi 146216710</a> | <a href="#">leucine-rich repeat protein [Nicotiana tabacum]</a>                                                                                                                                       | 52  | 21382  | 0.18  |
| 93 | <a href="#">gi 83584404</a>  | <a href="#">EIN3-binding F-box protein 2 [Lycopersicon esculentum]</a>                                                                                                                                | 52  | 71154  | 0.05  |
| 94 | <a href="#">gi 417371</a>    | <a href="#">Non-specific lipid-transfer protein 2 precursor (LTP 2)[Nicotiana tabacum]</a>                                                                                                            | 50  | 11407  | 0.35  |
| 95 | <a href="#">gi 55294668</a>  | <a href="#">putative ML domain protein [Nicotiana glauca]</a>                                                                                                                                         | 49  | 20139  | 0.19  |
| 96 | <a href="#">gi 125573356</a> | <a href="#">hypothetical protein Os_004696 [Oryza sativa (japonica cultivar-group)]</a>                                                                                                               | 48  | 43722  | 0.08  |
| 97 | <a href="#">gi 157341025</a> | <a href="#">unnamed protein product [Vitis vinifera]</a>                                                                                                                                              | 48  | 43416  | 0.09  |

**Supplementary Table 2.** Proteins identified in 'CV-N without NAA in MS' sample. Recombinant protein is highlighted in red.

| Hit number | Database access number | Protein description | Mascot score | Mass | emPAI |
|------------|------------------------|---------------------|--------------|------|-------|
|------------|------------------------|---------------------|--------------|------|-------|

|    |                            |                                                                                                                                                                                        |            |              |             |
|----|----------------------------|----------------------------------------------------------------------------------------------------------------------------------------------------------------------------------------|------------|--------------|-------------|
| 1  | gi 63002585                | peroxidase [Nicotiana tabacum]                                                                                                                                                         | 885        | 35563        | 4.01        |
| 2  | gi 75315324                | Peroxidase N1 precursor (Peroxidase B2) (Peroxidase B3)                                                                                                                                | 769        | 35709        | 3.49        |
| 3  | gi 116314                  | Endochitinase A precursor (CHN-A)                                                                                                                                                      | 691        | 35134        | 2.39        |
| 4  | gi 63253080                | peroxidase [Nicotiana tabacum]                                                                                                                                                         | 531        | 38505        | 1.78        |
| 5  | gi 64976605                | peroxidase [Nicotiana tabacum]                                                                                                                                                         | 521        | 38740        | 1.77        |
| 6  | gi 62362434                | nectarin IV [Nicotiana langsdorffii x Nicotiana sanderae]                                                                                                                              | 498        | 46948        | 0.85        |
| 7  | gi 467689                  | chitinase/lysozyme [Nicotiana tabacum]                                                                                                                                                 | 498        | 41993        | 0.98        |
| 8  | gi 226121                  | glucan endoglucosidase [Nicotiana tabacum]                                                                                                                                             | 468        | 39137        | 1.28        |
| 9  | gi 129837                  | Lignin-forming anionic peroxidase precursor (TOPA) [Nicotiana tabacum]                                                                                                                 | 446        | 34652        | 1.28        |
| 10 | gi 131015                  | Pathogenesis-related protein R major form precursor (Thaumatococcus-like protein E22) [Nicotiana tabacum]                                                                              | 445        | 24650        | 1.74        |
| 11 | gi 108752035 gb ABG02914.1 | <b>cyanovirin-N [synthetic construct]</b>                                                                                                                                              | <b>422</b> | <b>10923</b> | <b>7.87</b> |
| 12 | gi 148299083               | subtilisin-like protease [Nicotiana tabacum]                                                                                                                                           | 415        | 81137        | 0.37        |
| 13 | gi 505267                  | chitinase, class V [Nicotiana tabacum]                                                                                                                                                 | 401        | 41754        | 0.68        |
| 14 | gi 19970                   | prb-1b [Nicotiana tabacum]                                                                                                                                                             | 357        | 20107        | 1.86        |
| 15 | gi 182410392               | PR1 protein [Solanum lycopersicum]                                                                                                                                                     | 334        | 20110        | 1.86        |
| 16 | gi 116332                  | Acidic endochitinase precursor [Nicotiana tabacum]                                                                                                                                     | 332        | 31263        | 0.77        |
| 17 | gi 19859                   | glucan endo-1,3-beta-glucosidase [Nicotiana tabacum]                                                                                                                                   | 316        | 37835        | 0.46        |
| 18 | gi 131017                  | Pathogenesis-related protein R minor form precursor (PR-R) (PROB12) (Thaumatococcus-like protein E2) [Nicotiana tabacum]                                                               | 300        | 24535        | 1.06        |
| 19 | gi 116342                  | Acidic endochitinase Q precursor (Pathogenesis-related protein Q) (PR-Q)                                                                                                               | 287        | 27615        | 0.9         |
| 20 | gi 130846                  | Basic form of pathogenesis-related protein 1 precursor (PRP 1) [Nicotiana tabacum]                                                                                                     | 282        | 19716        | 1.04        |
| 21 | gi 19783                   | osmotin [Nicotiana tabacum]                                                                                                                                                            | 266        | 27110        | 0.69        |
| 22 | gi 157355185               | unnamed protein product [Vitis vinifera]                                                                                                                                               | 215        | 39303        | 0.44        |
| 23 | gi 7547630                 | pathogen- and wound-inducible antifungal protein CBP20 precursor [Nicotiana tabacum]                                                                                                   | 207        | 22153        | 0.62        |
| 24 | gi 3913932                 | Proteinase inhibitor type-2 precursor (Proteinase inhibitor type II) [Nicotiana tabacum]                                                                                               | 207        | 20970        | 0.96        |
| 25 | gi 19771                   | acidic chitinase PR-P [Nicotiana tabacum]                                                                                                                                              | 203        | 27512        | 0.47        |
| 26 | gi 2497757                 | Non-specific lipid-transfer protein 1 precursor (LTP 1) (Pathogenesis-related protein 14) (PR-14) [Nicotiana tabacum]                                                                  | 194        | 11516        | 0.34        |
| 27 | gi 119012                  | Glucan endo-1,3-beta-glucosidase, acidic isoform G19 precursor ((1->3)-beta-glucan endohydrolase) ((1->3)-beta-glucanase) (Beta-1,3-endoglucanase) (PR-2B) (PR-36) [Nicotiana tabacum] | 182        | 37699        | 0.46        |
| 28 | gi 83281191                | putative glycerophosphoryl diester phosphodiesterase family protein [Nicotiana tabacum]                                                                                                | 179        | 81954        | 0.14        |
| 29 | gi 130840                  | Pathogenesis-related protein PR-4B precursor [Nicotiana tabacum]                                                                                                                       | 178        | 16225        | 1.49        |
| 30 | gi 30526289                | 29 kDa chitinase-like thermal hysteresis protein [Solanum dulcamara]                                                                                                                   | 175        | 28827        | 0.45        |
| 31 | gi 6538778                 | biotic cell death-associated protein [Nicotiana glutinosa]                                                                                                                             | 174        | 25142        | 0.53        |
| 32 | gi 37359708                | LEXYL2 [Solanum lycopersicum]                                                                                                                                                          | 173        | 68869        | 0.17        |
| 33 | gi 218308                  | peroxidase [Nicotiana tabacum]                                                                                                                                                         | 173        | 34504        | 0.51        |
| 34 | gi 19962                   | pathogenesis-related protein 4A [Nicotiana tabacum]                                                                                                                                    | 172        | 16195        | 1.36        |
| 35 | gi 547743                  | Trypsin inhibitor 1 precursor (Trypsin inhibitor I) (NSTI-I)                                                                                                                           | 165        | 10458        | 1.65        |
| 36 | gi 1255951                 | PS60 [Nicotiana tabacum]                                                                                                                                                               | 162        | 60107        | 0.2         |
| 37 | gi 5381253                 | peroxidase [Nicotiana tabacum]                                                                                                                                                         | 161        | 34348        | 0.23        |
| 38 | gi 32482806                | putative xyloglucanase inhibitor [Solanum tuberosum]                                                                                                                                   | 146        | 46779        | 0.17        |
| 39 | gi 21495                   | chitinase; endochitinase [Solanum tuberosum]                                                                                                                                           | 145        | 28777        | 0.28        |
| 40 | gi 11528439                | chitinase [Fragaria x ananassa]                                                                                                                                                        | 144        | 28307        | 0.29        |
| 41 | gi 2541876                 | CND41, chloroplast nucleoid DNA binding protein [Nicotiana tabacum]                                                                                                                    | 142        | 53413        | 0.22        |
| 42 | gi 547732                  | Proteinase inhibitor I-A precursor (PI-IA) (Inhibitor of microbial serine proteinases minor isoform)                                                                                   | 132        | 11872        | 0.78        |
| 43 | gi 37359706                | LEXYL1 [Solanum lycopersicum]                                                                                                                                                          | 126        | 83111        | 0.09        |
| 44 | gi 21668053                | non-specific lipid transfer protein [Nicotiana tabacum]                                                                                                                                | 123        | 11723        | 0.14        |
| 45 | gi 113531030               | properoxidase [Picea abies]                                                                                                                                                            | 117        | 32859        | 0.24        |
| 46 | gi 547733                  | Proteinase inhibitor I-B precursor (PI-IB) (Inhibitor of microbial serine proteinases major isoform)                                                                                   | 111        | 11908        | 0.78        |
| 47 | gi 90992878                | phyloplanin [Nicotiana tabacum]                                                                                                                                                        | 108        | 11302        | 0.83        |
| 48 | gi 157355449               | unnamed protein product [Vitis vinifera]                                                                                                                                               | 107        | 34368        | 0.23        |
| 49 | gi 146216710               | leucine-rich repeat protein [Nicotiana tabacum]                                                                                                                                        | 105        | 21382        | 0.39        |
| 50 | gi 76446068                | trypsin proteinase inhibitor precursor [Nicotiana corymbosa]                                                                                                                           | 101        | 16198        | 0.54        |
| 51 | gi 119507463               | pectin methylesterase 2 [Pyrus communis]                                                                                                                                               | 99         | 62606        | 0.12        |
| 52 | gi 218304                  | PR1a protein precursor [Nicotiana tabacum]                                                                                                                                             | 97         | 18578        | 0.46        |
| 53 | gi 18403247                | receptor protein kinase-related [Arabidopsis thaliana]                                                                                                                                 | 97         | 27846        | 0.29        |
| 54 | gi 115486089               | Os11g0592000 [Oryza sativa (japonica cultivar-group)]                                                                                                                                  | 97         | 16246        | 0.54        |
| 55 | gi 417371                  | Non-specific lipid-transfer protein 2 precursor (LTP 2)                                                                                                                                | 88         | 11407        |             |
| 56 | gi 688429                  | tumor-related protein [Nicotiana glauca x Nicotiana langsdorffii]                                                                                                                      | 87         | 13798        | 0.65        |
| 57 | gi 267124                  | Thioredoxin H-type 1 (Trx-H1)                                                                                                                                                          | 87         | 13947        | 0.28        |

|    |              |                                                                                          |    |       |      |
|----|--------------|------------------------------------------------------------------------------------------|----|-------|------|
| 58 | gi 19948     | PR1b preprotein [ <i>Nicotiana tabacum</i> ]                                             | 86 | 16693 | 0.52 |
| 59 | gi 169555    | anionic peroxidase                                                                       | 82 | 37324 | 0.2  |
| 60 | gi 85813772  | xylan 1,4-beta-xylosidase [ <i>Populus alba</i> x <i>Populus tremula</i> ]               | 79 | 81424 | 0.05 |
| 61 | gi 7939581   | thionin like protein [ <i>Nicotiana tabacum</i> ]                                        | 76 | 8571  | 0.48 |
| 62 | gi 10798758  | P-rich protein NtElG-C29 [ <i>Nicotiana tabacum</i> ]                                    | 75 | 13376 | 0.29 |
| 63 | gi 32351452  | class III peroxidase [ <i>Gossypium hirsutum</i> ]                                       | 75 | 35399 |      |
| 64 | gi 172046673 | Unknown protein 1                                                                        | 63 | 1031  | 7.22 |
| 65 | gi 15231303  | ATEXLA1 (ARABIDOPSIS THALIANA EXPANSIN-LIKE A1) [ <i>Arabidopsis thaliana</i> ]          | 60 | 28683 | 0.13 |
| 66 | gi 536789    | PR-1c protein [ <i>Nicotiana tabacum</i> ]                                               | 58 | 17717 | 0.21 |
| 67 | gi 82568706  | Serine carboxypeptidase [ <i>Prunus mume</i> ]                                           | 57 | 55936 | 0.07 |
| 68 | gi 498926    | glucan endo-1,3-beta-D-glucosidase [ <i>Solanum lycopersicum</i> ]                       | 56 | 37839 | 0.1  |
| 69 | gi 15219493  | peroxidase, putative [ <i>Arabidopsis thaliana</i> ]                                     | 56 | 37717 | 0.1  |
| 70 | gi 62732994  | Ribosome inactivating protein, putative [ <i>Oryza sativa</i> (japonica cultivar-group)] | 54 | 46294 | 0.08 |
| 71 | gi 25044849  | peroxidase [ <i>Ananas comosus</i> ]                                                     | 50 | 35591 | 0.11 |
| 72 | gi 6716760   | methionine synthase [ <i>Coffea arabica</i> ]                                            | 49 | 24430 | 0.16 |
| 73 | gi 115489060 | Os12g0560400 [ <i>Oryza sativa</i> (japonica cultivar-group)]                            | 48 | 11736 | 0.34 |
| 74 | gi 15218665  | peroxidase, putative [ <i>Arabidopsis thaliana</i> ]                                     | 47 | 34310 | 0.11 |
